# Supplementary material for: Palladium N-heterocyclic carbene catalyzed regioselective C–H halogenation of 1-aryl-3-methyl-1H-pyrazol-5(4H)-ones using N-halosuccinimides (NXS)
Source: Royal Society of Chemistry journal article supplement (doi:10.1039/c5cy00137d), 2015-01-01

**Palladium N-heterocyclic carbene catalyzed regioselective C-H halogenation of 1-Aryl-3-methyl-1H-pyrazol-5(4H)-ones using N-halosuccinimides (NXS)**

*Vishal B. Purohit\*, Sharad C. Karad, Kirit H. Patel, Dipak K. Raval*

*Department of Chemistry, Sardar Patel University, Vallabh Vidyanagar- 388 120, Gujarat, India*

*\*Corresponding author. Tel.: +91-02692-226856 - Ext. - 208; Fax: +91-02692 236475.*

*E-mail: [vishalpurohit113@gmail.com](mailto:vishalpurohit113@gmail.com), [dipanalka@yahoo.com](mailto:dipanalka@yahoo.com)*

## **Supplementary information**

# $^1\text{H}$ NMR spectra of $\text{Pd}(\text{NHC})\text{Cl}_2$ Catalyst

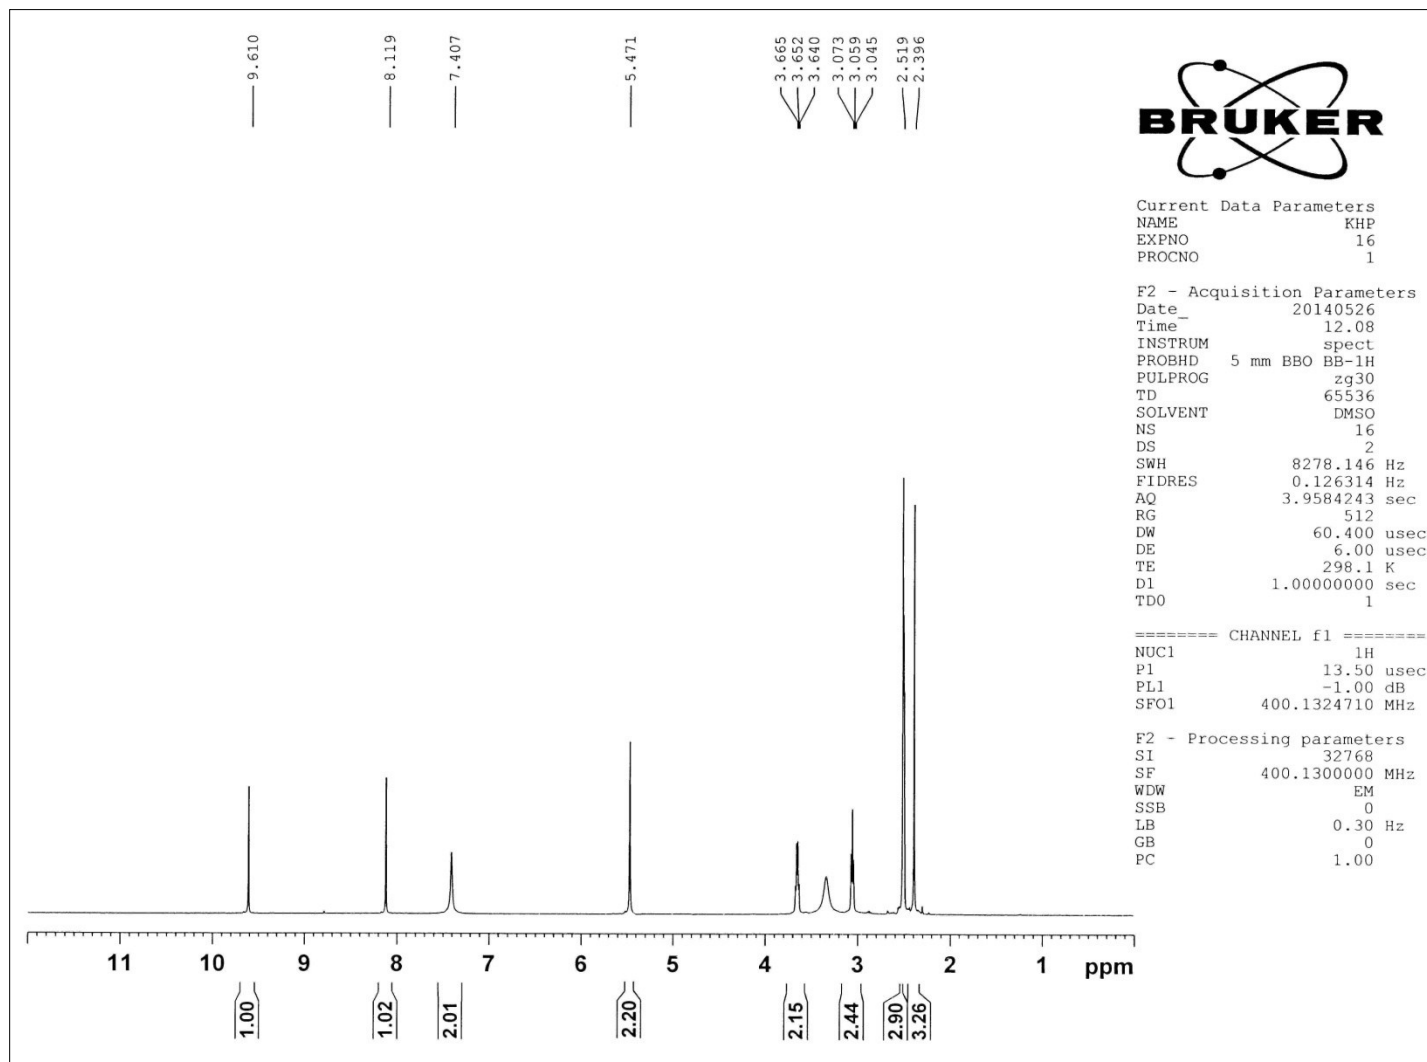

<sup>1</sup>H NMR spectra of compound 2a

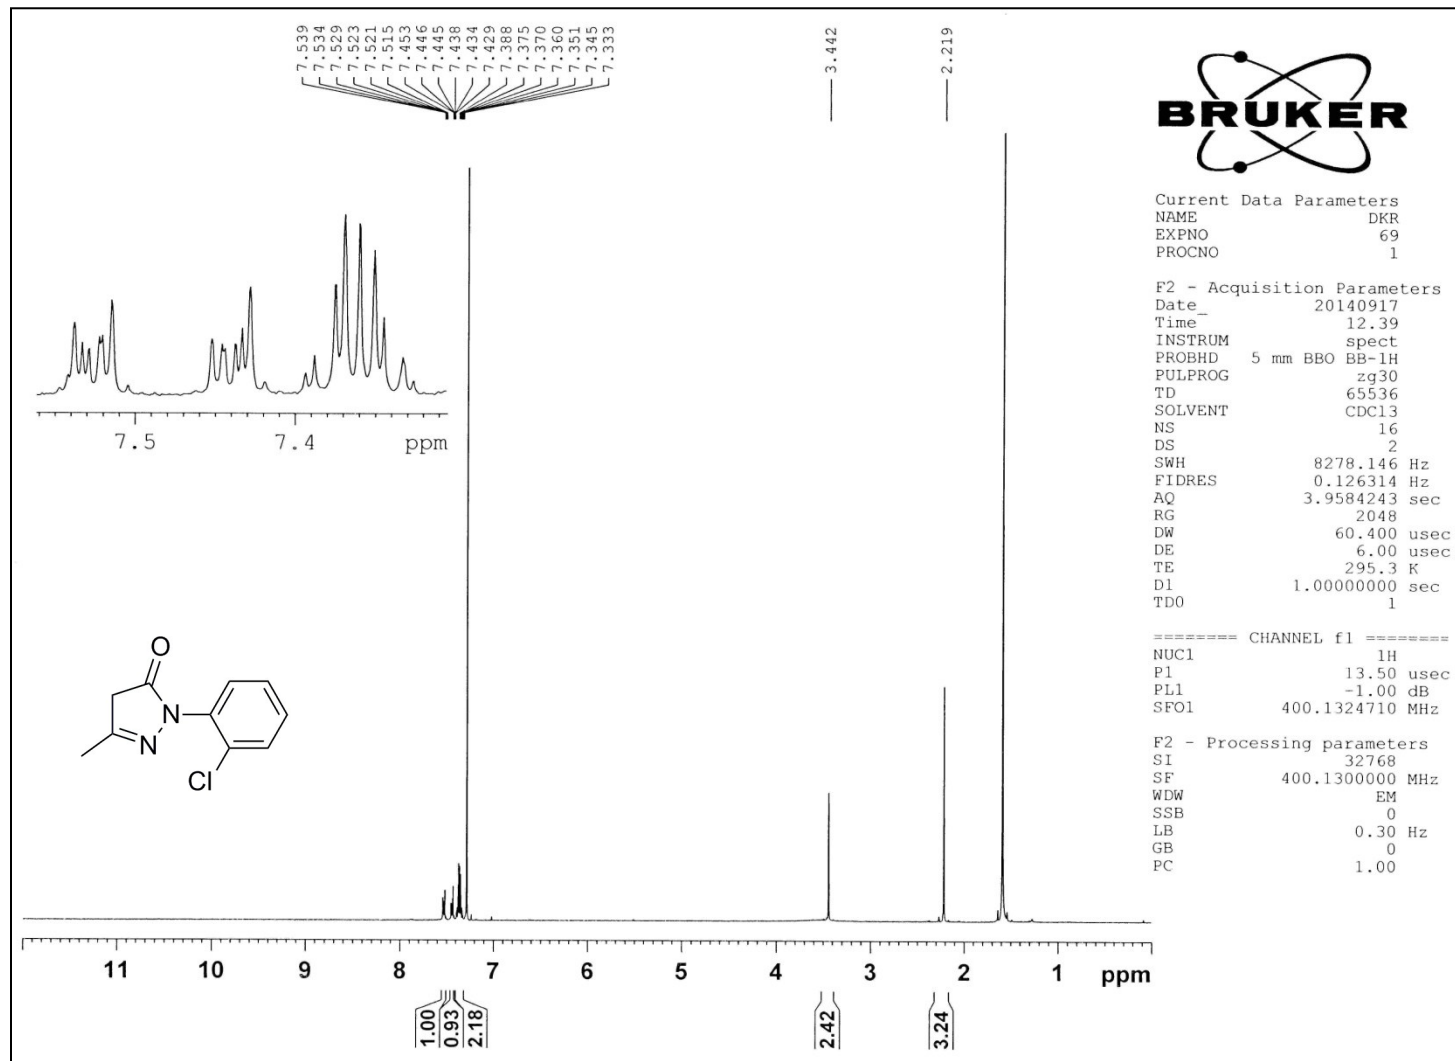

<sup>13</sup>C NMR spectra of compound 2a

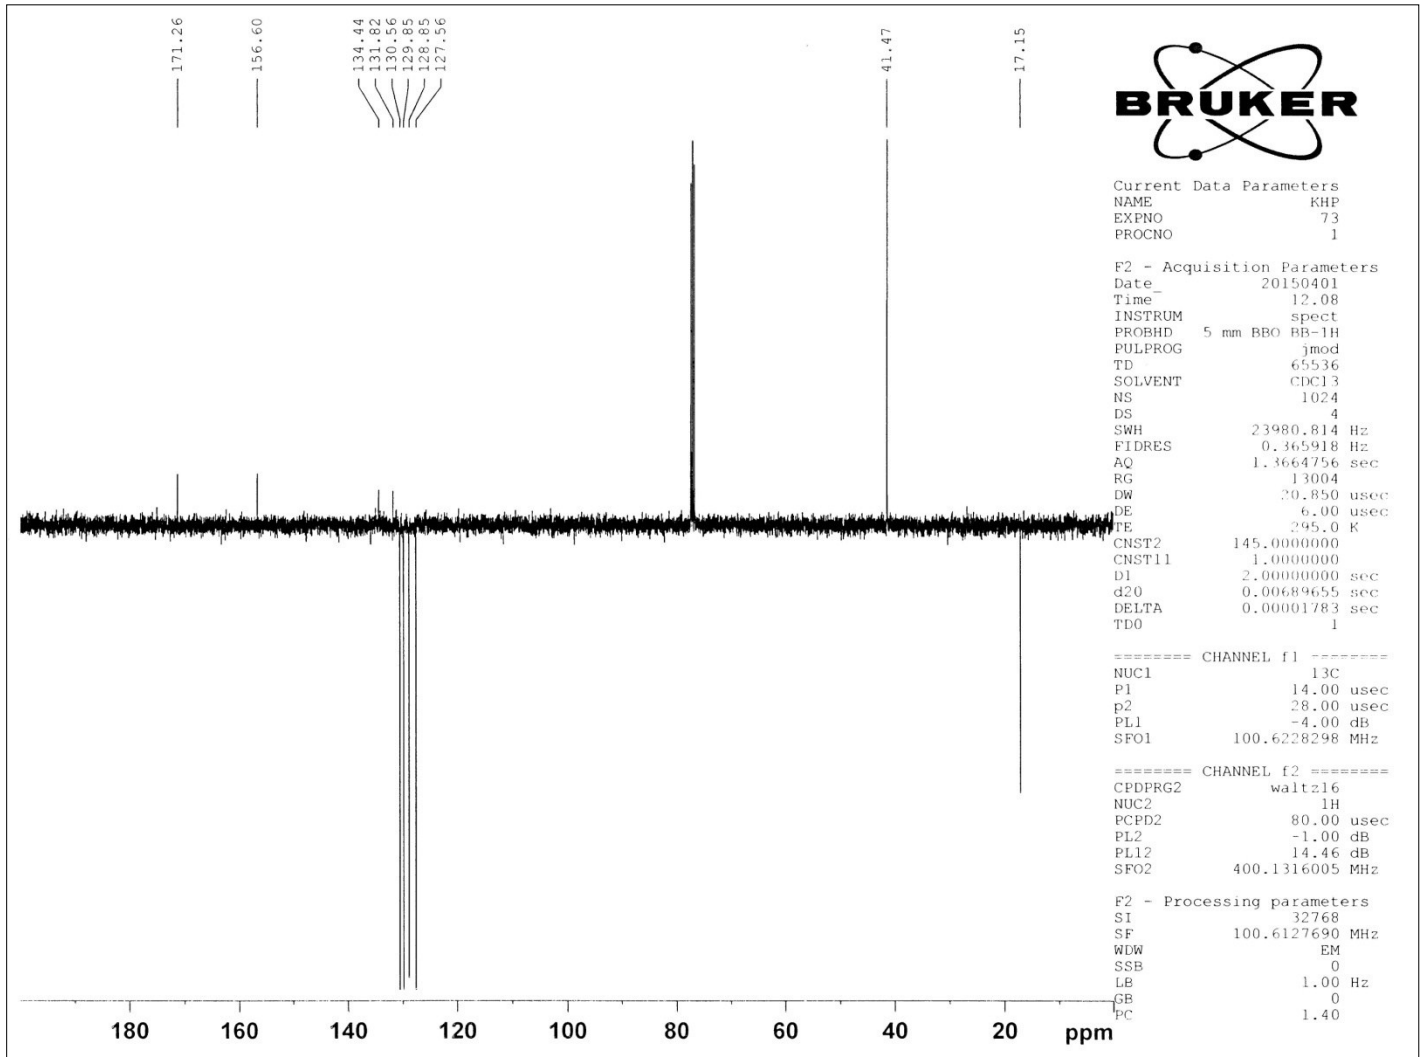

<sup>1</sup>H NMR spectra of compound **2b**

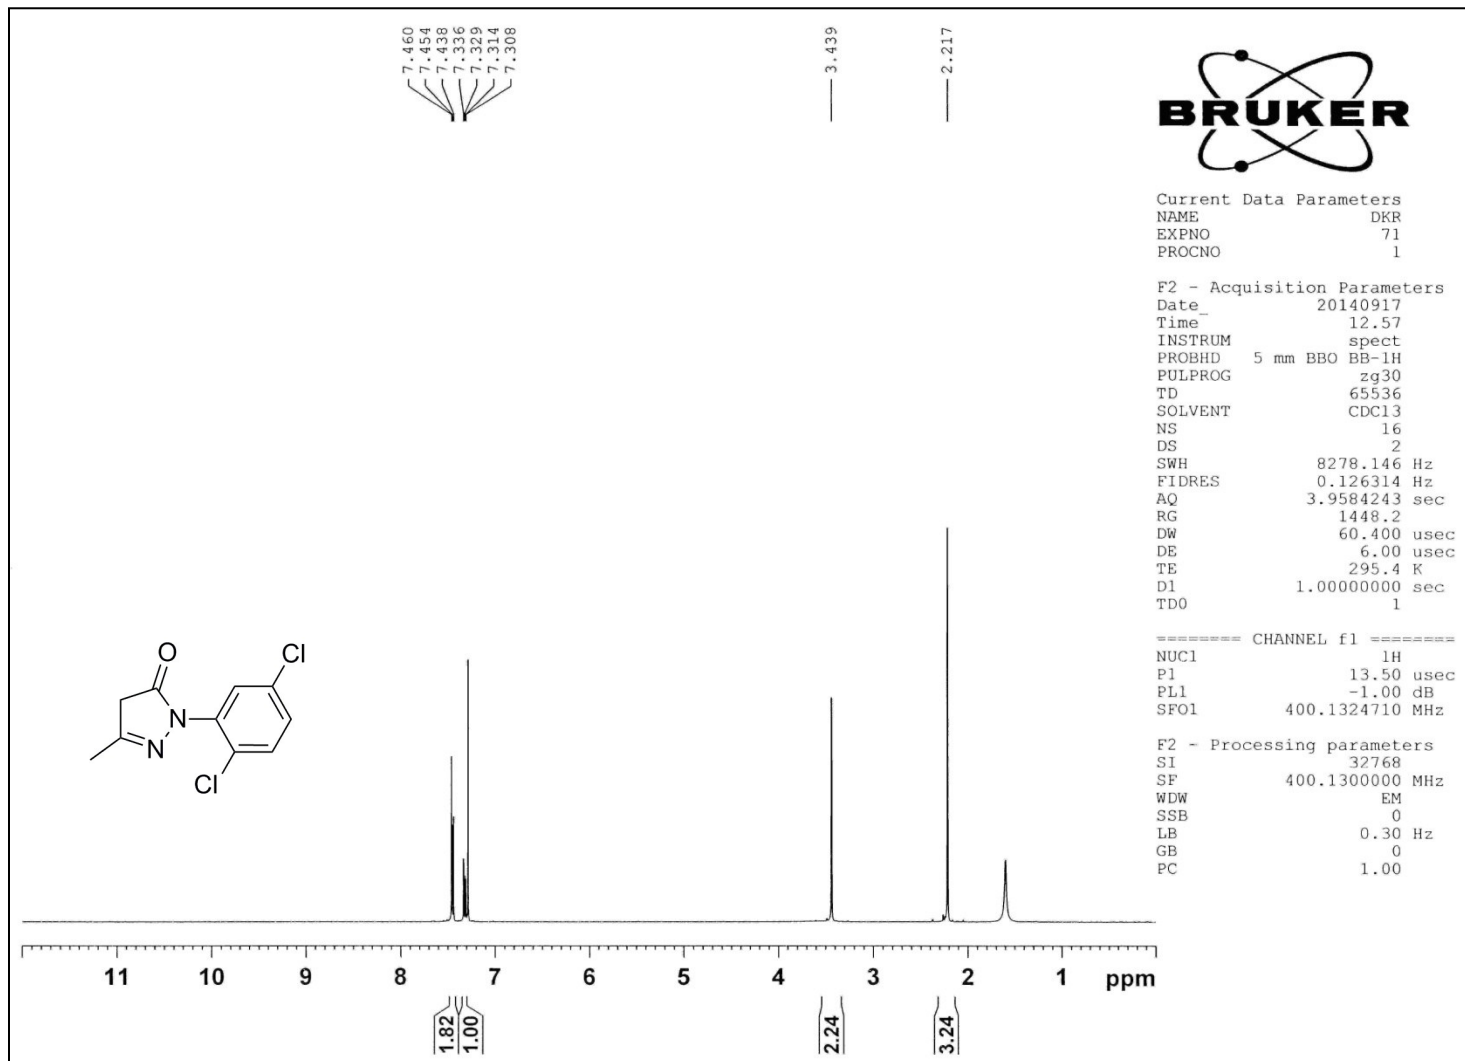

<sup>13</sup>C NMR spectra of compound **2b**

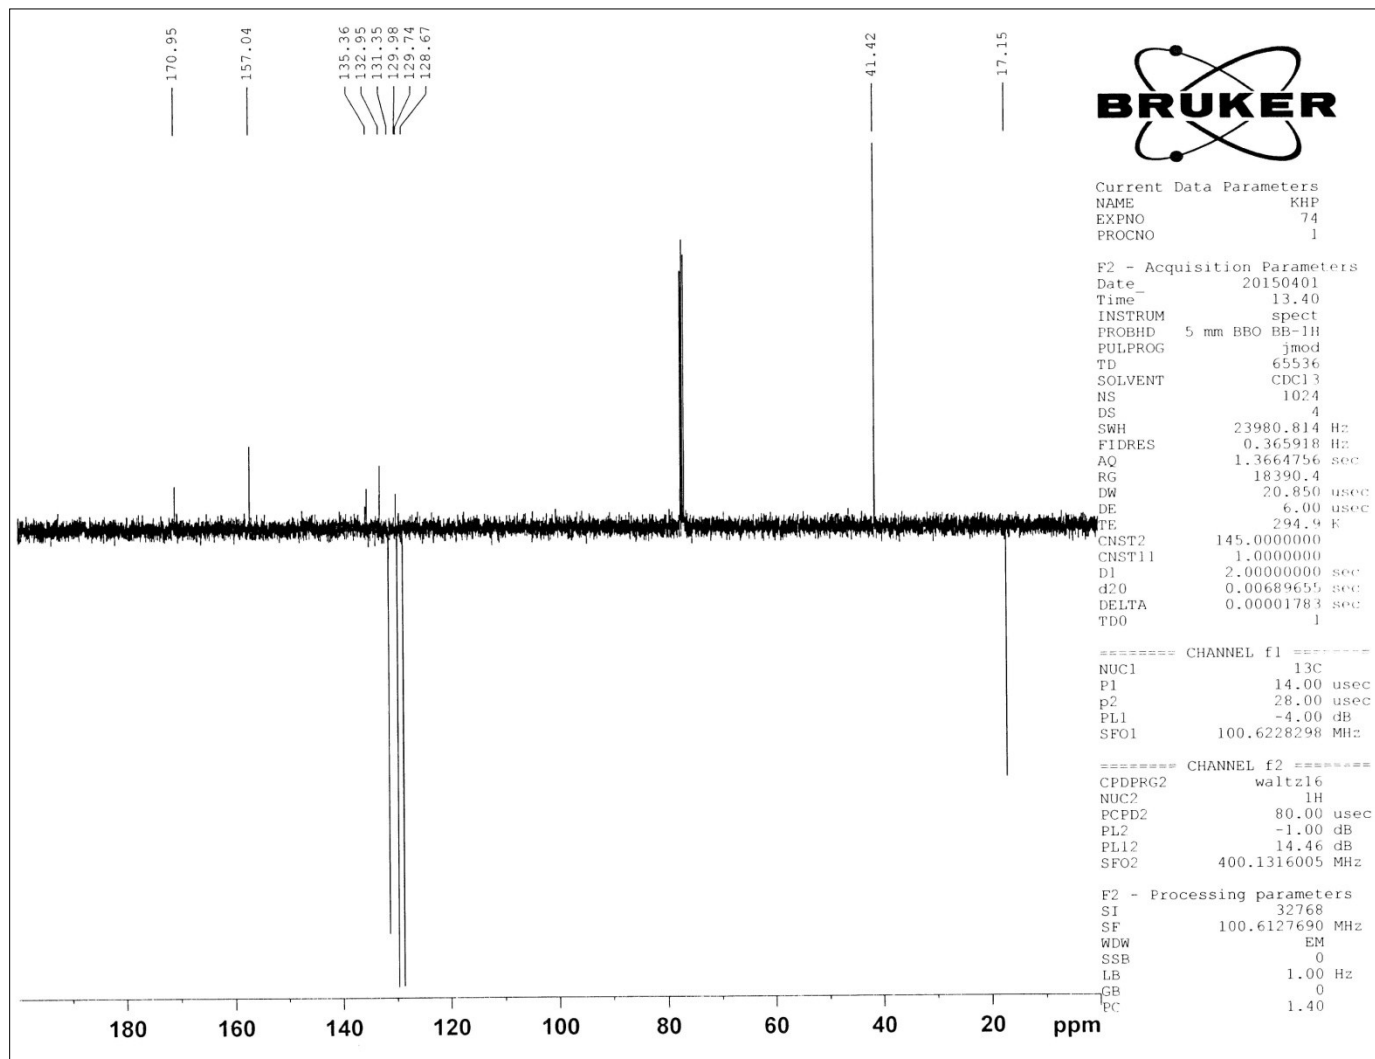

<sup>1</sup>H NMR spectra of compound 2c

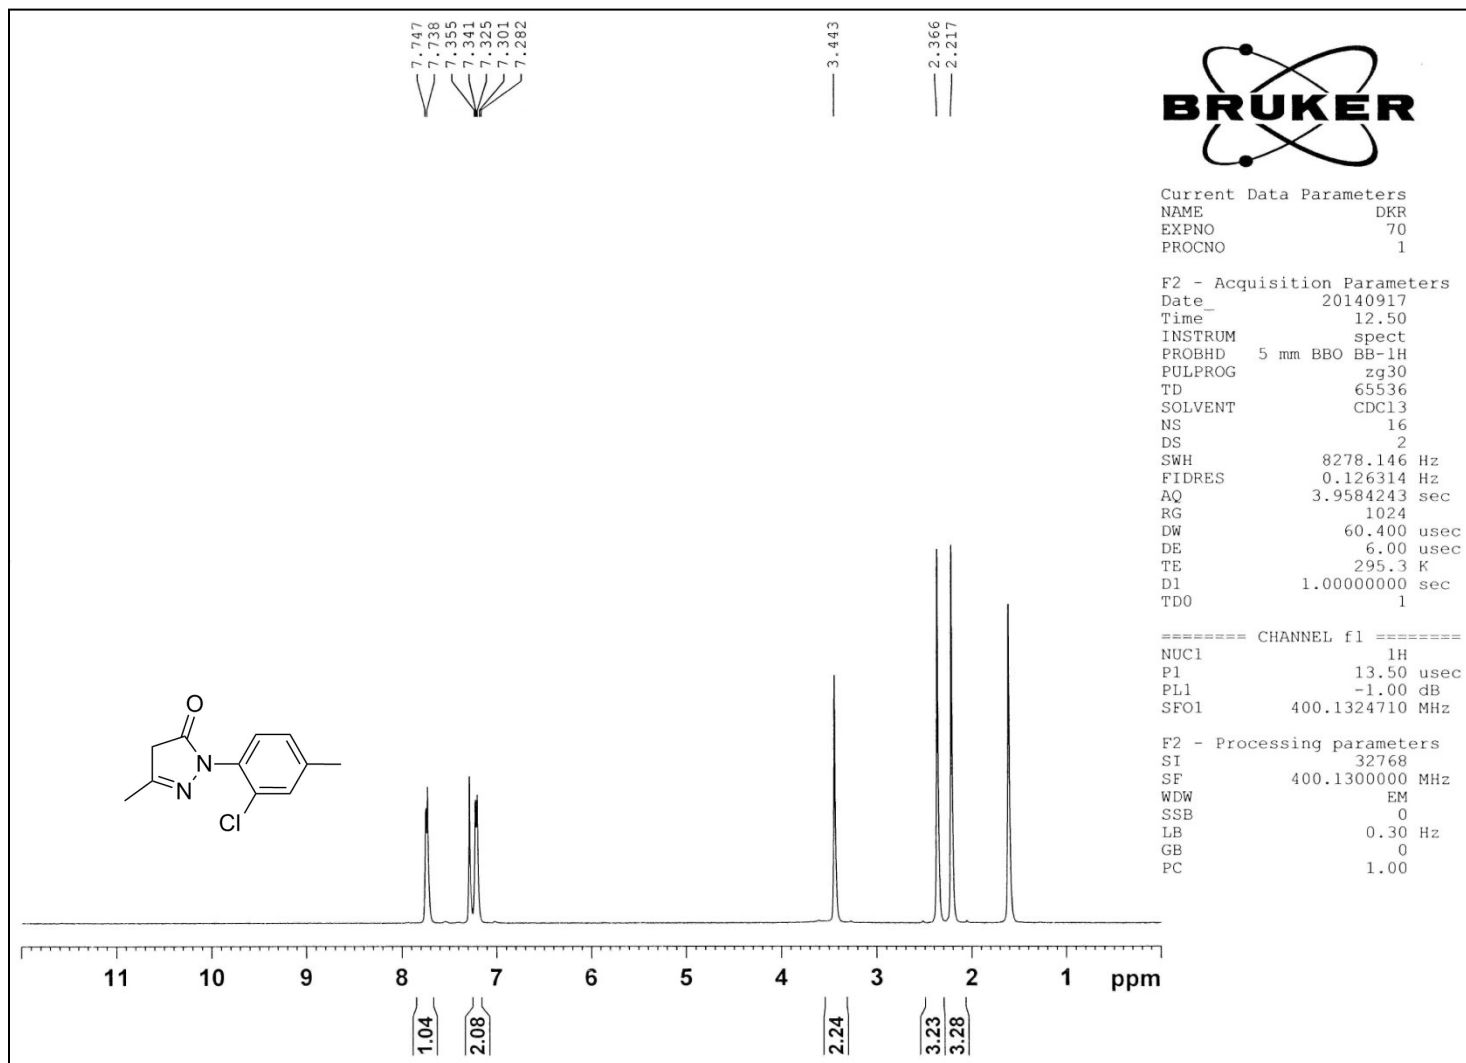

<sup>13</sup>C NMR spectra of compound 2c

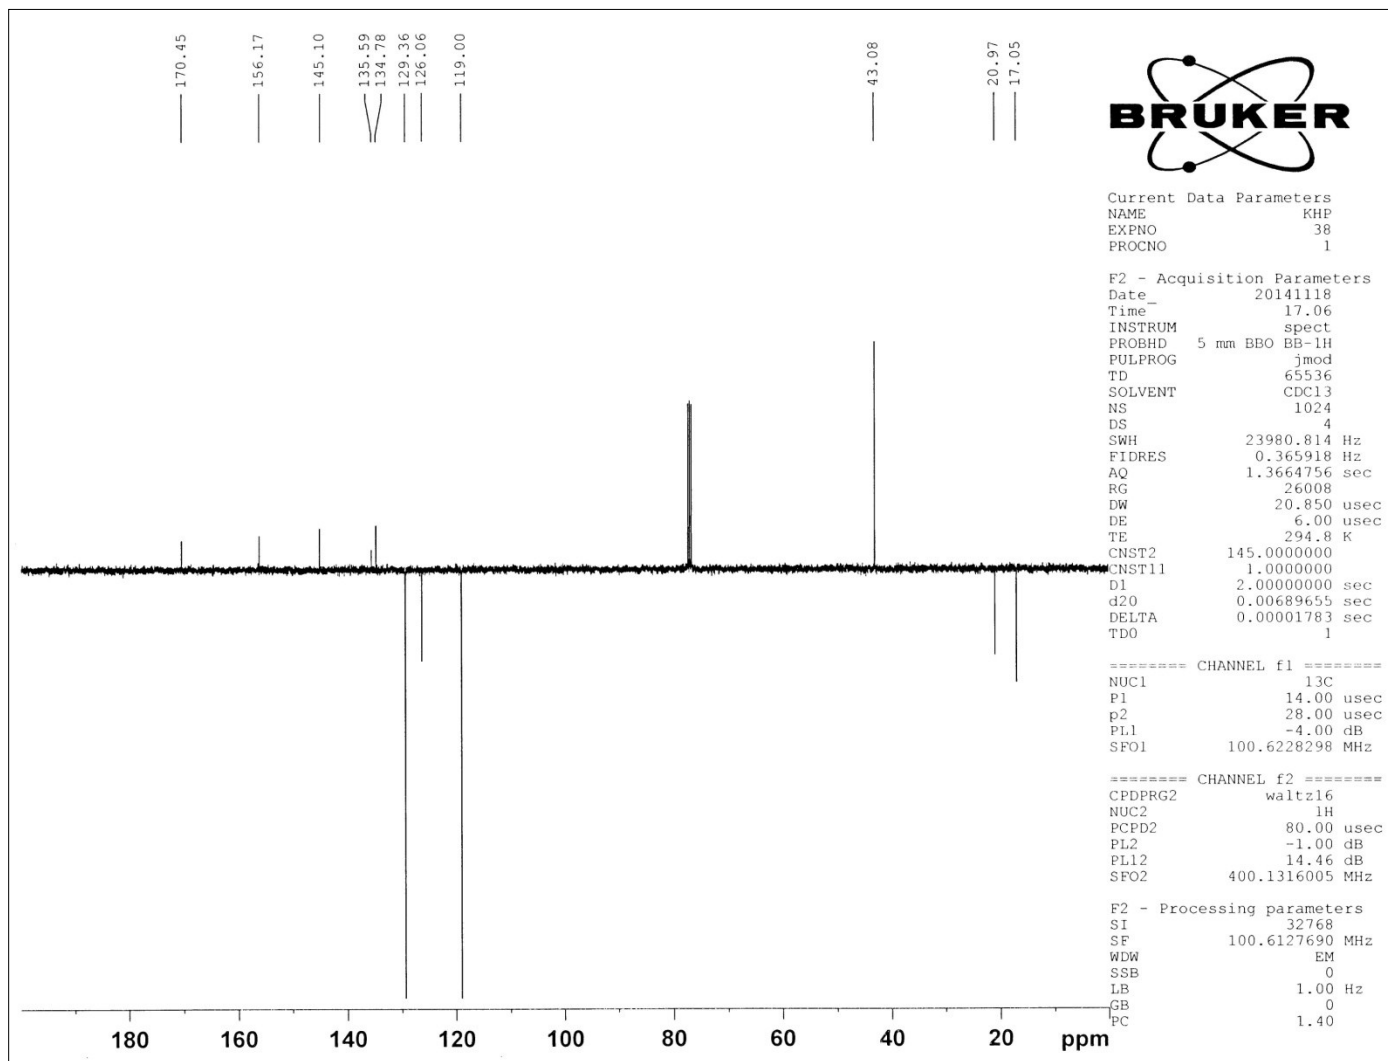



<sup>1</sup>H NMR spectra of compound **2d**

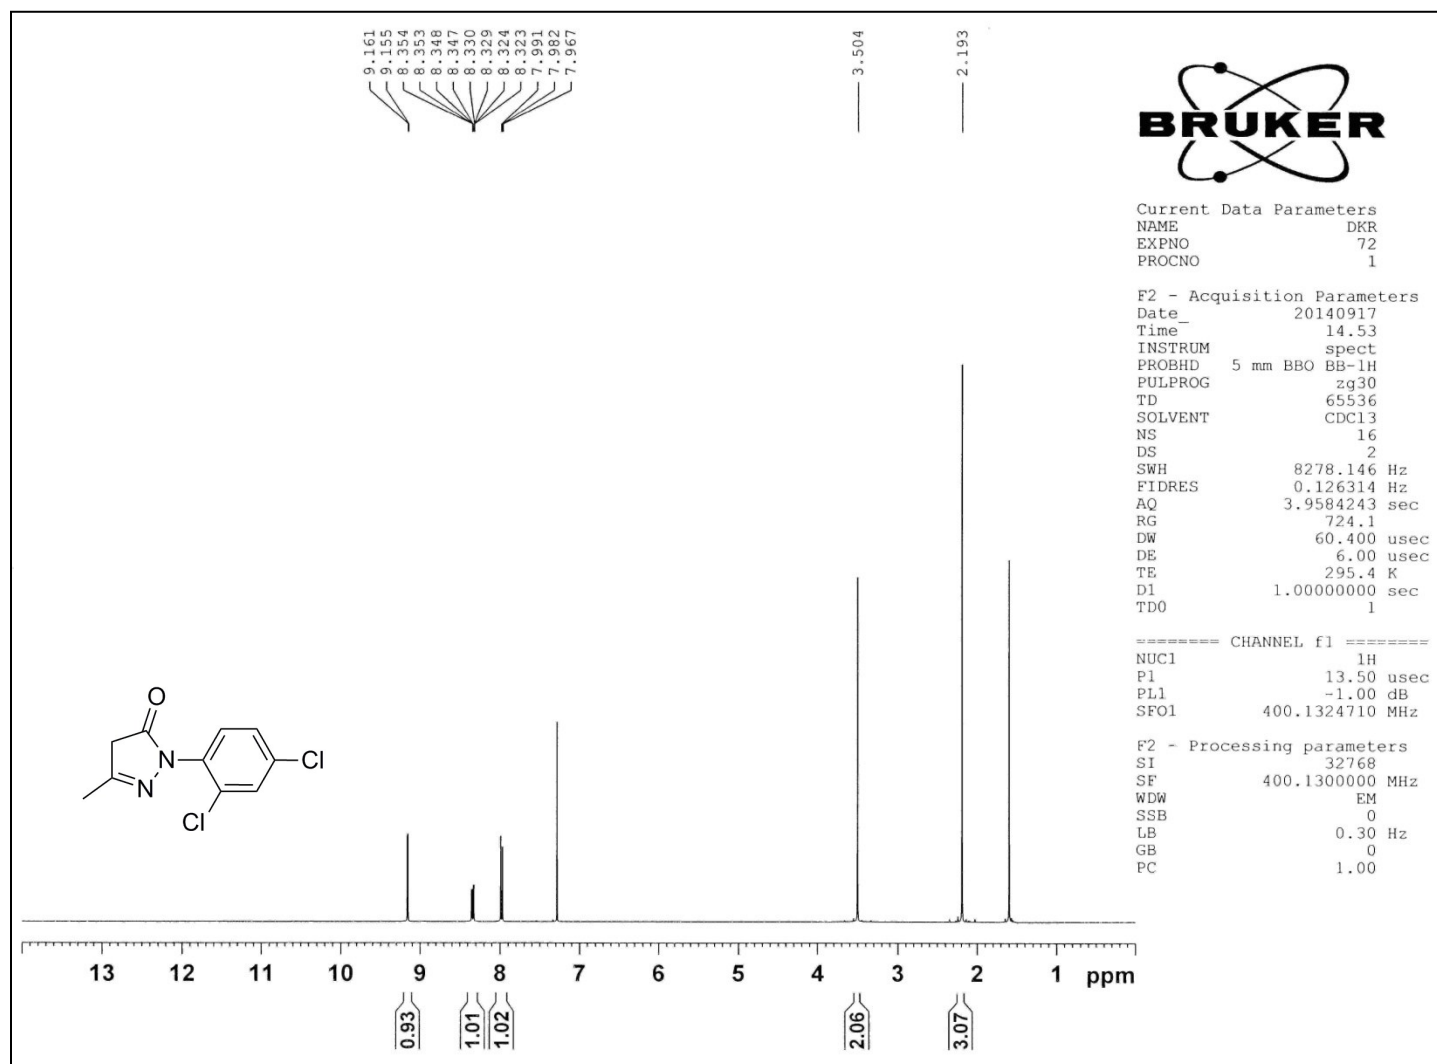

<sup>13</sup>C NMR spectra of compound 2d

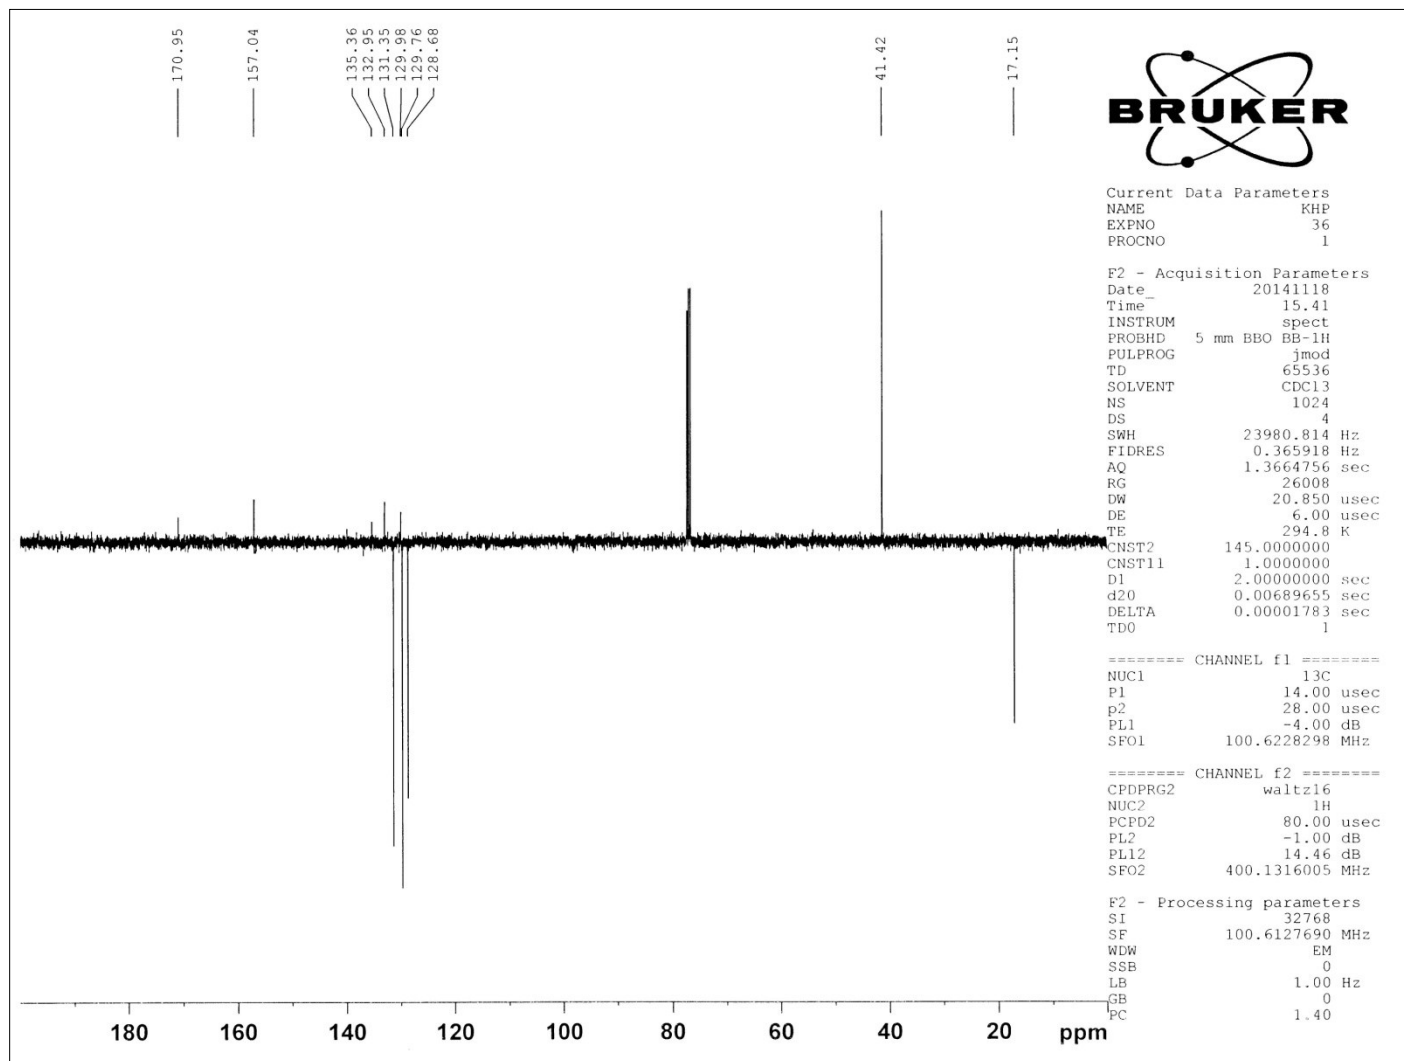

<sup>1</sup>H NMR spectra of compound 3a

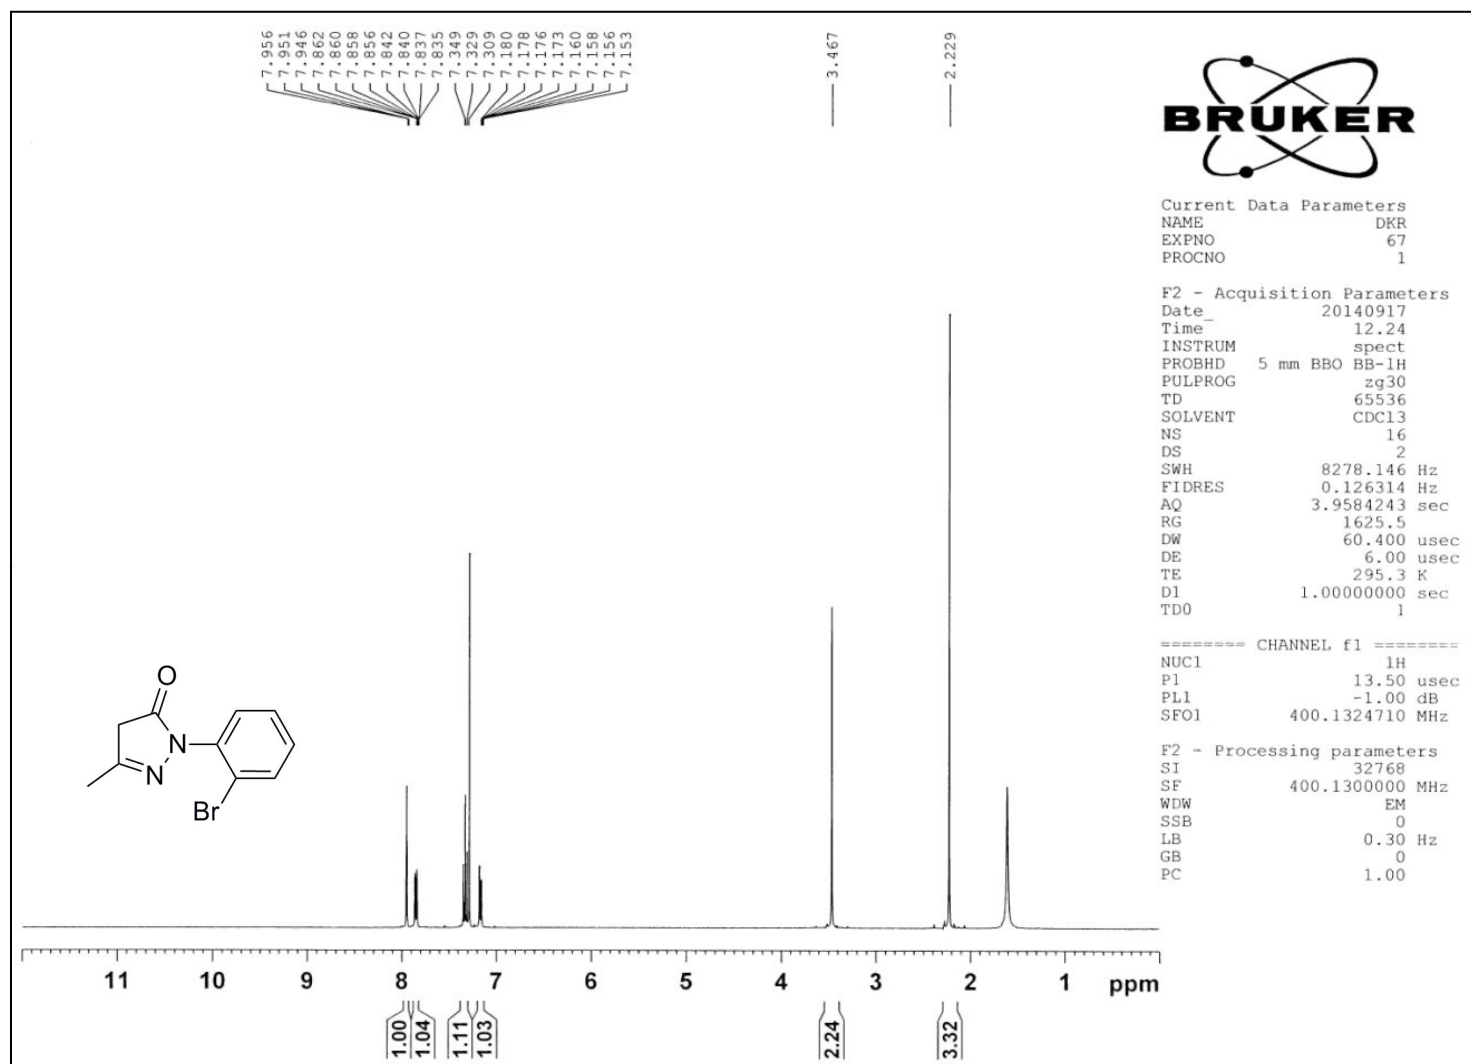

<sup>13</sup>C NMR spectra of compound 3a

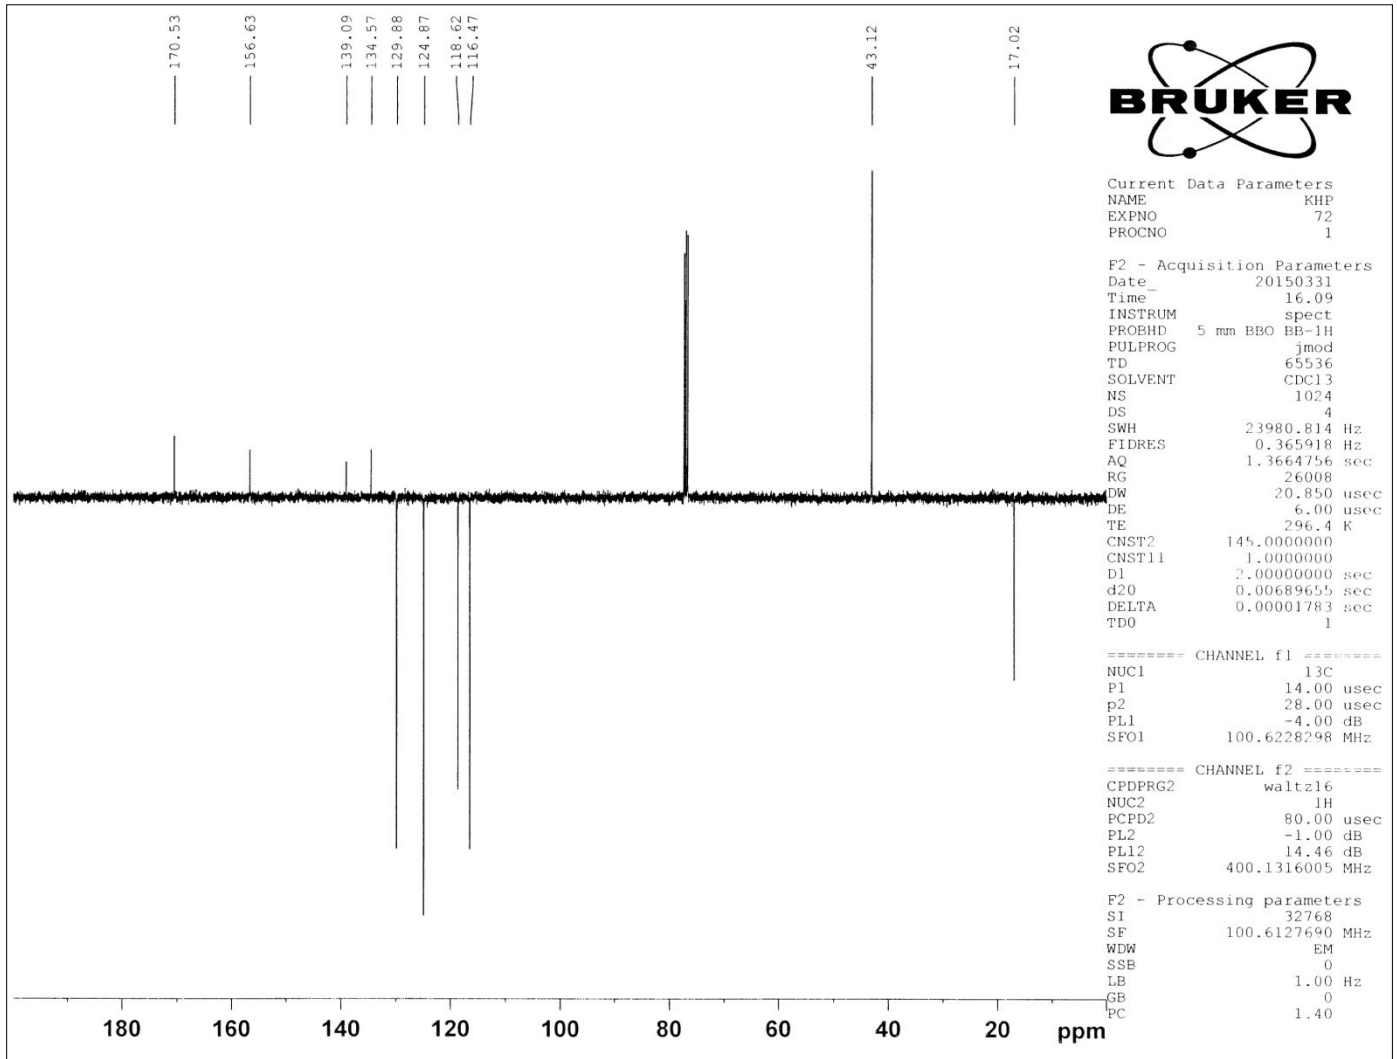

<sup>1</sup>H NMR spectra of compound **3b**

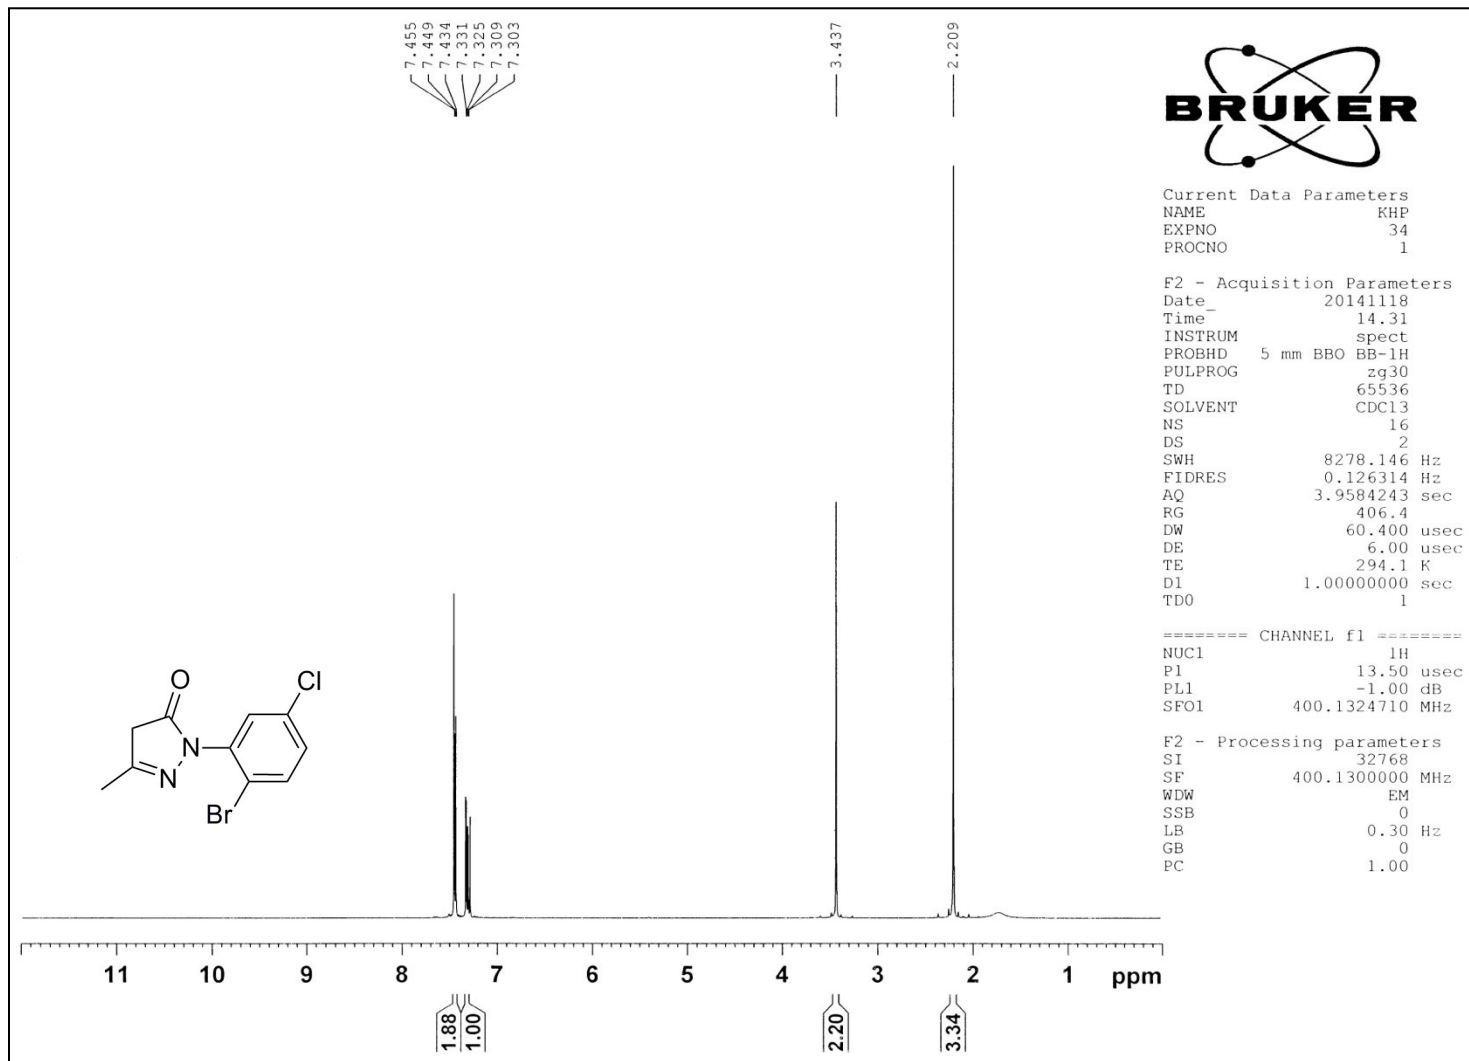

<sup>13</sup>C NMR spectra of compound **3b**

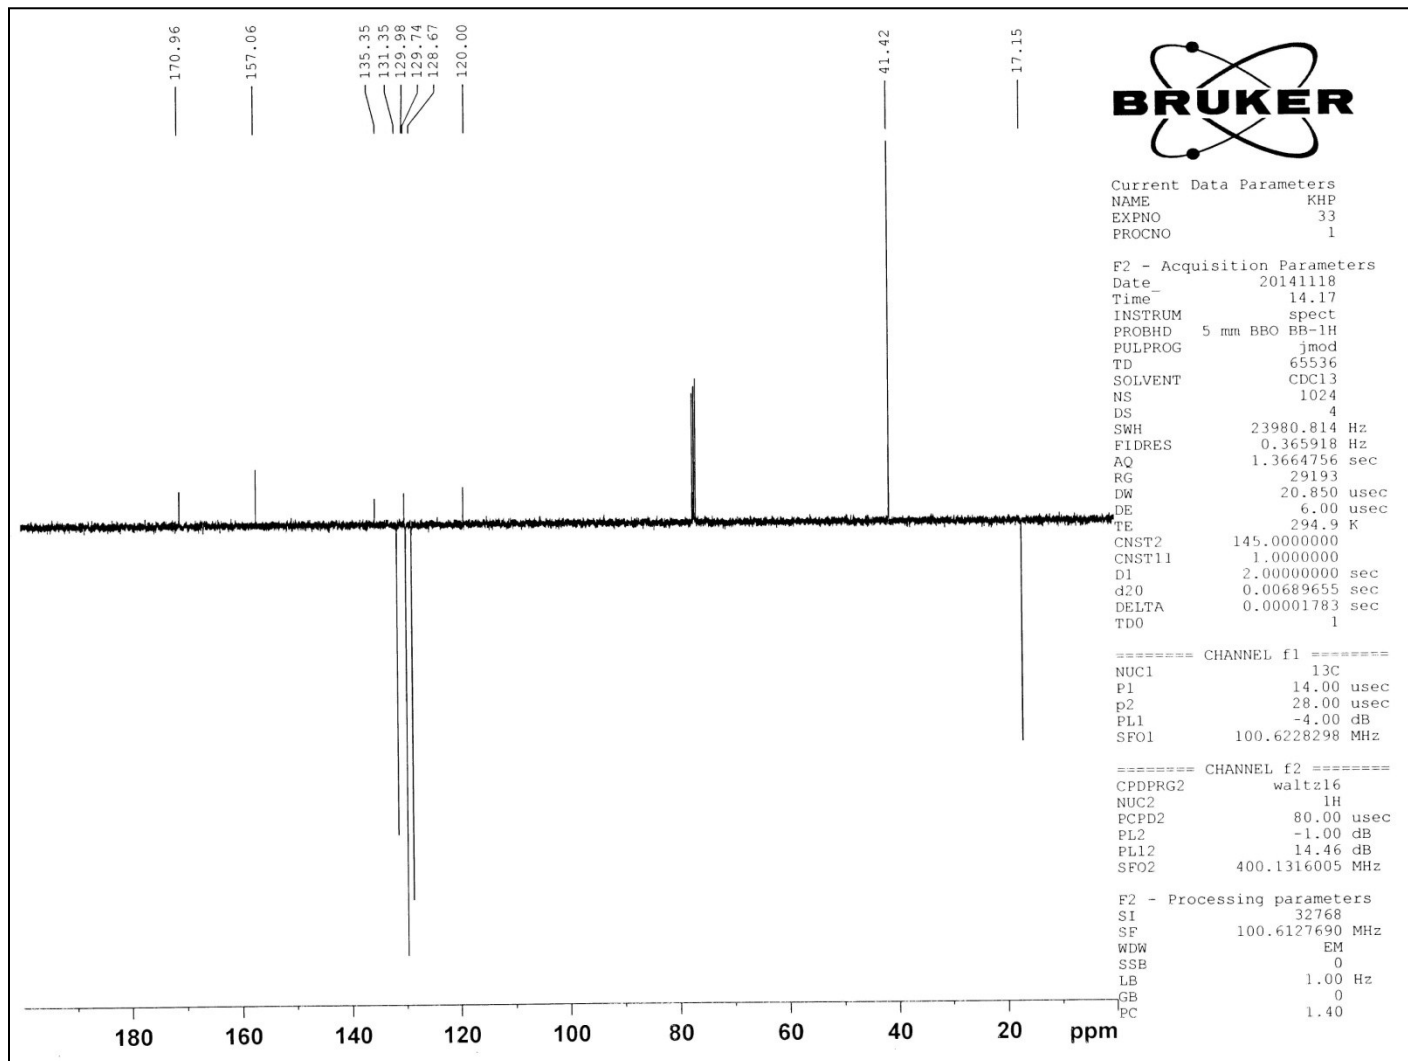

<sup>1</sup>H NMR spectra of compound **3c**

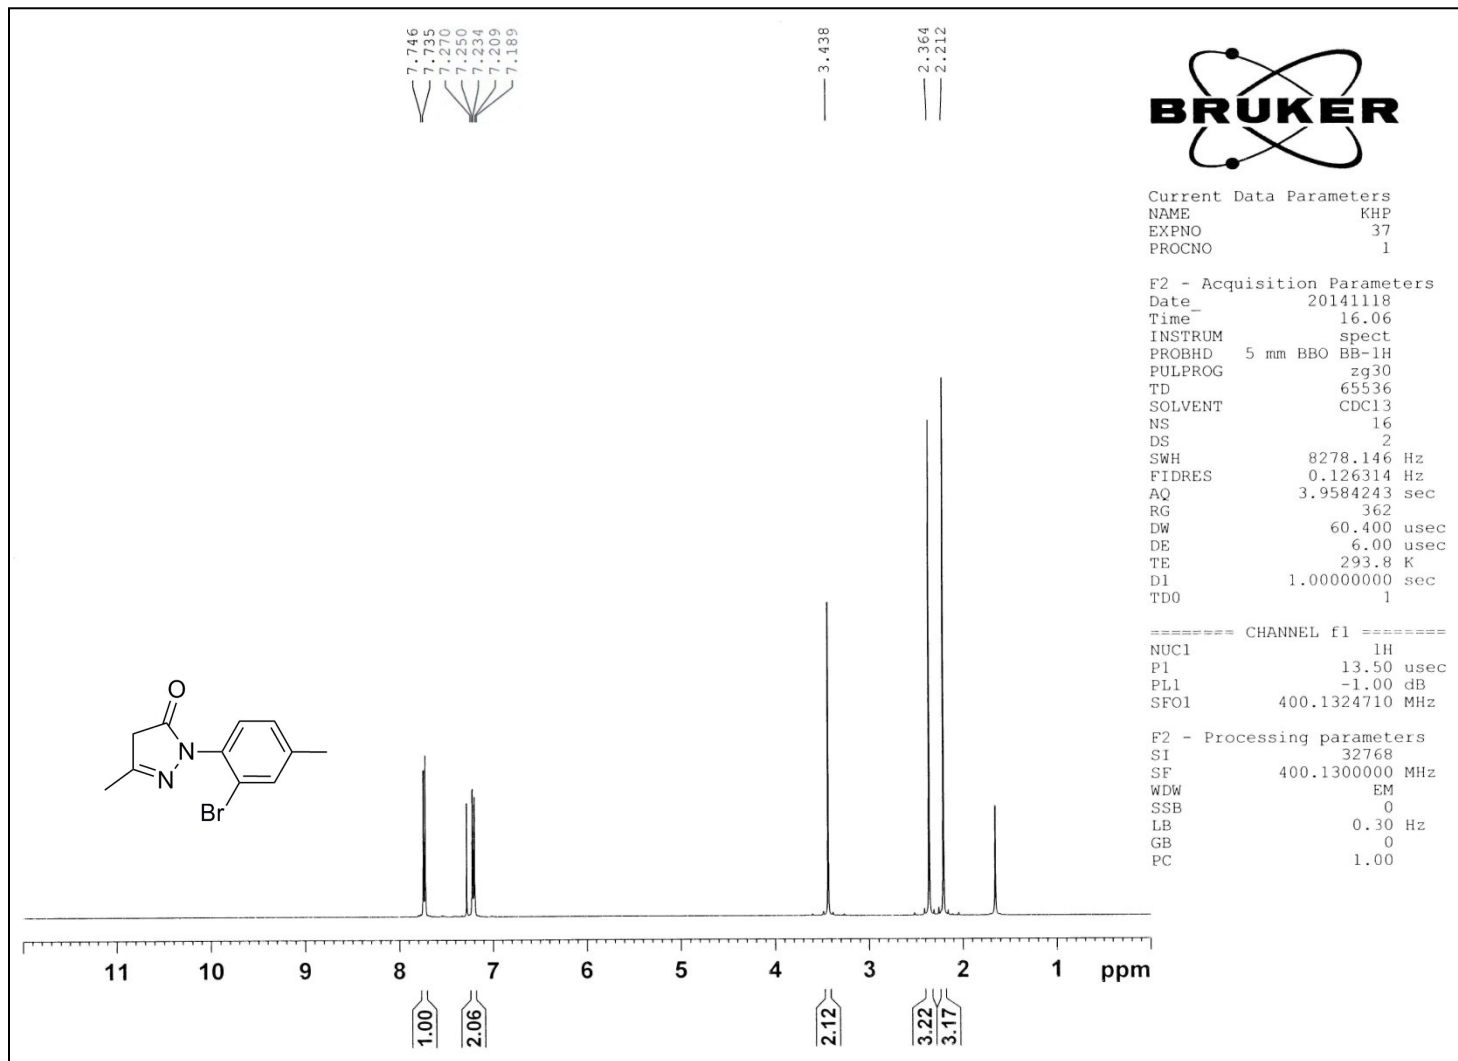

<sup>13</sup>C NMR spectra of compound **3c**

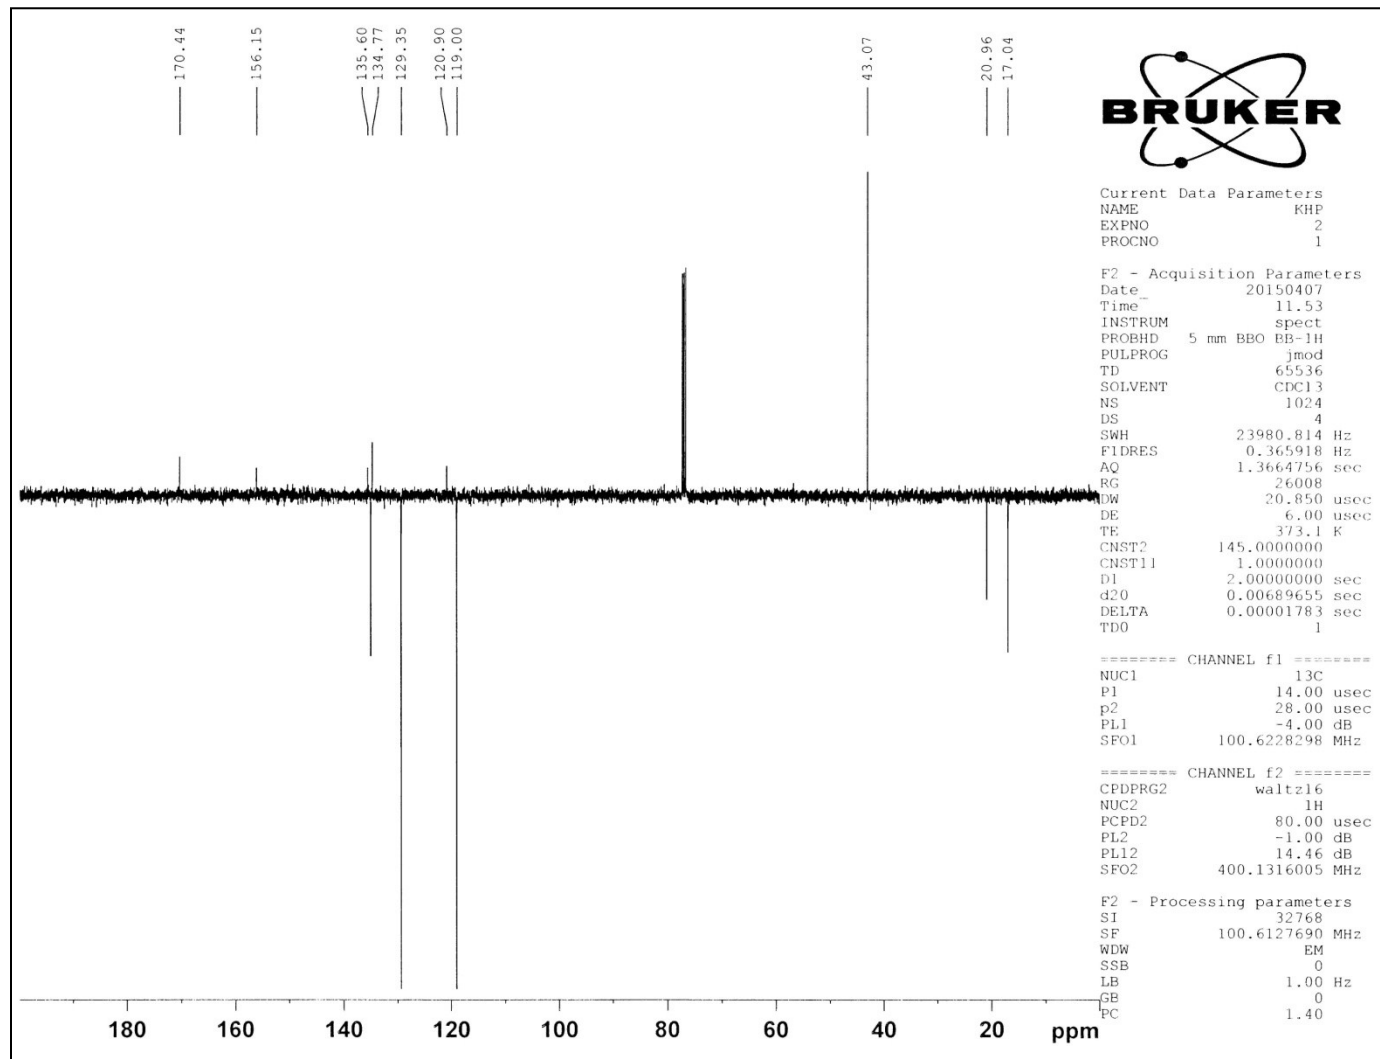



<sup>1</sup>H NMR spectra of compound **3d**

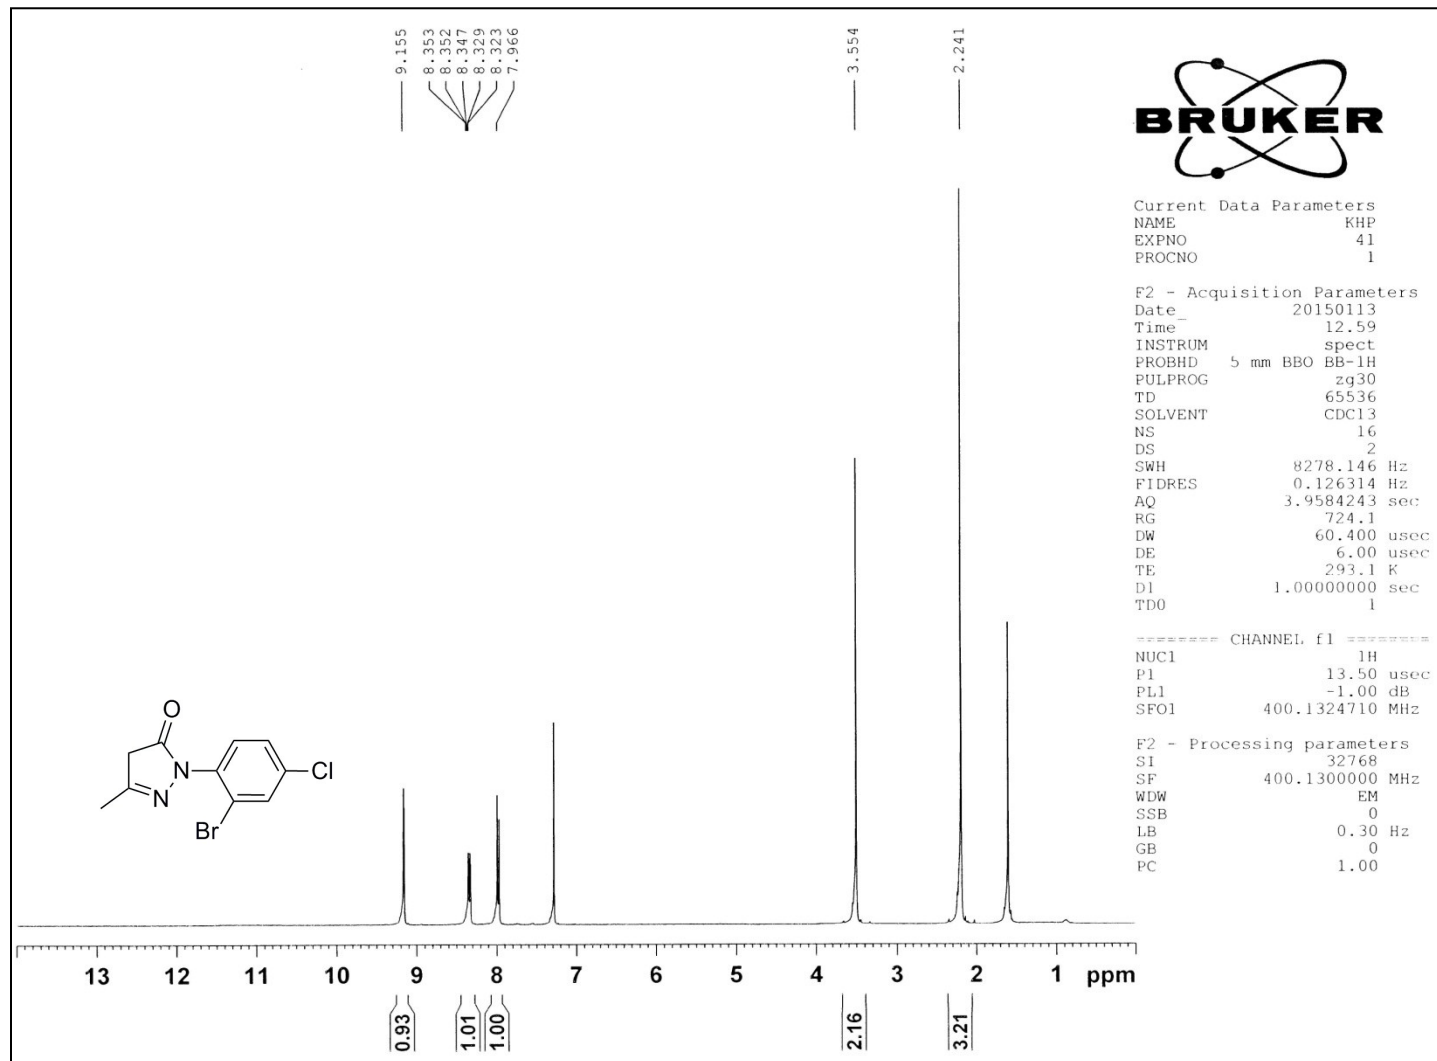

<sup>13</sup>C NMR spectra of compound **3d**

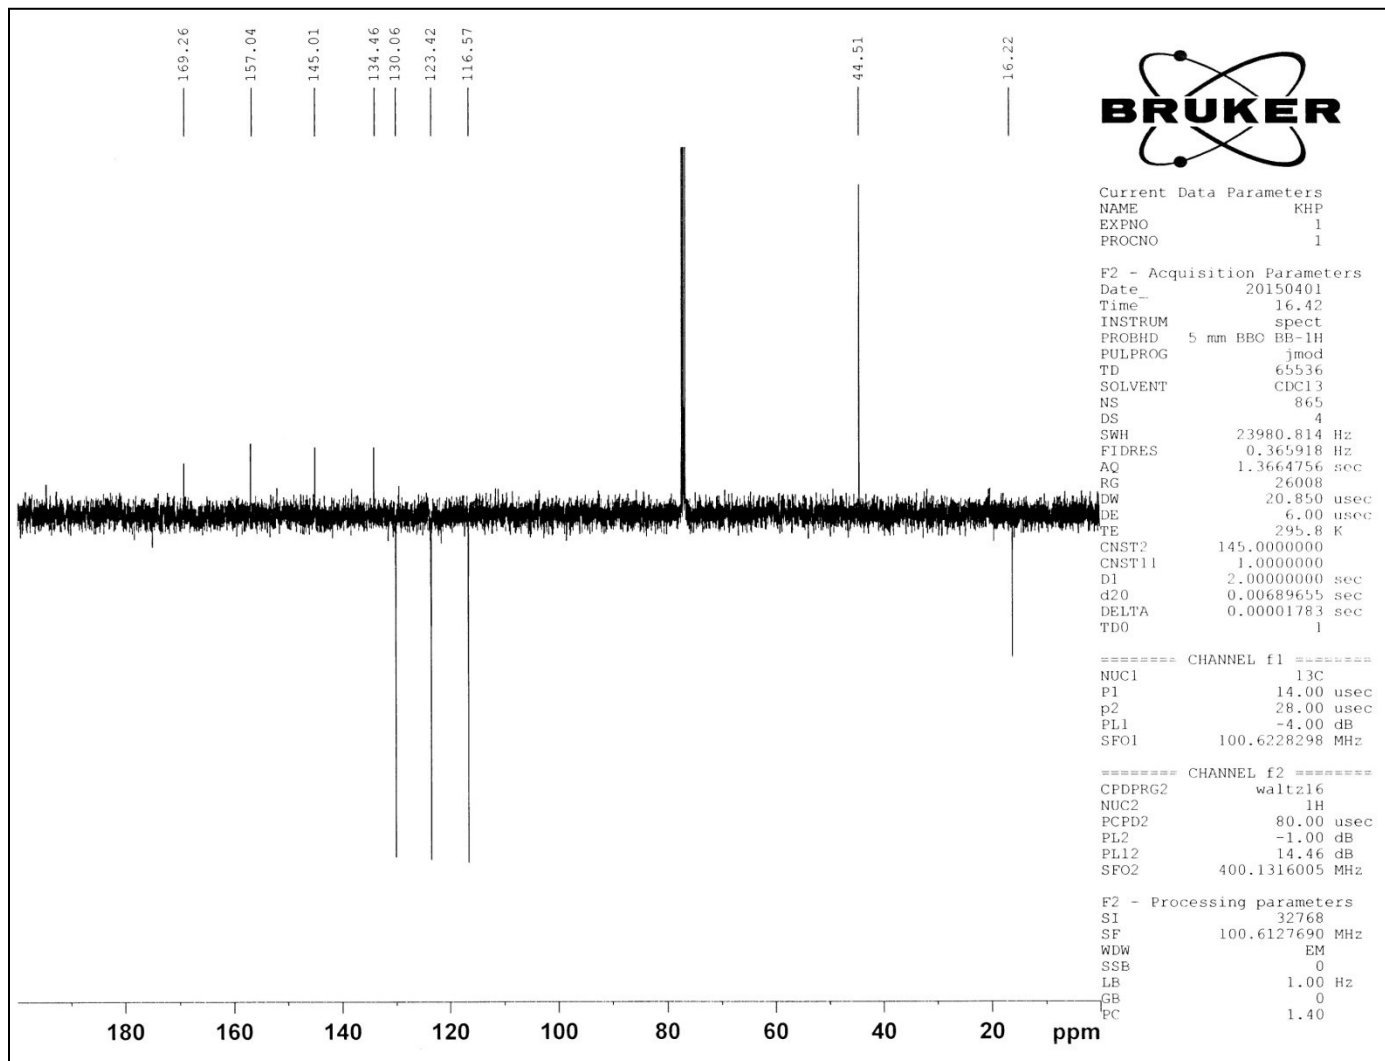

<sup>1</sup>H NMR spectra of compound **2a'**

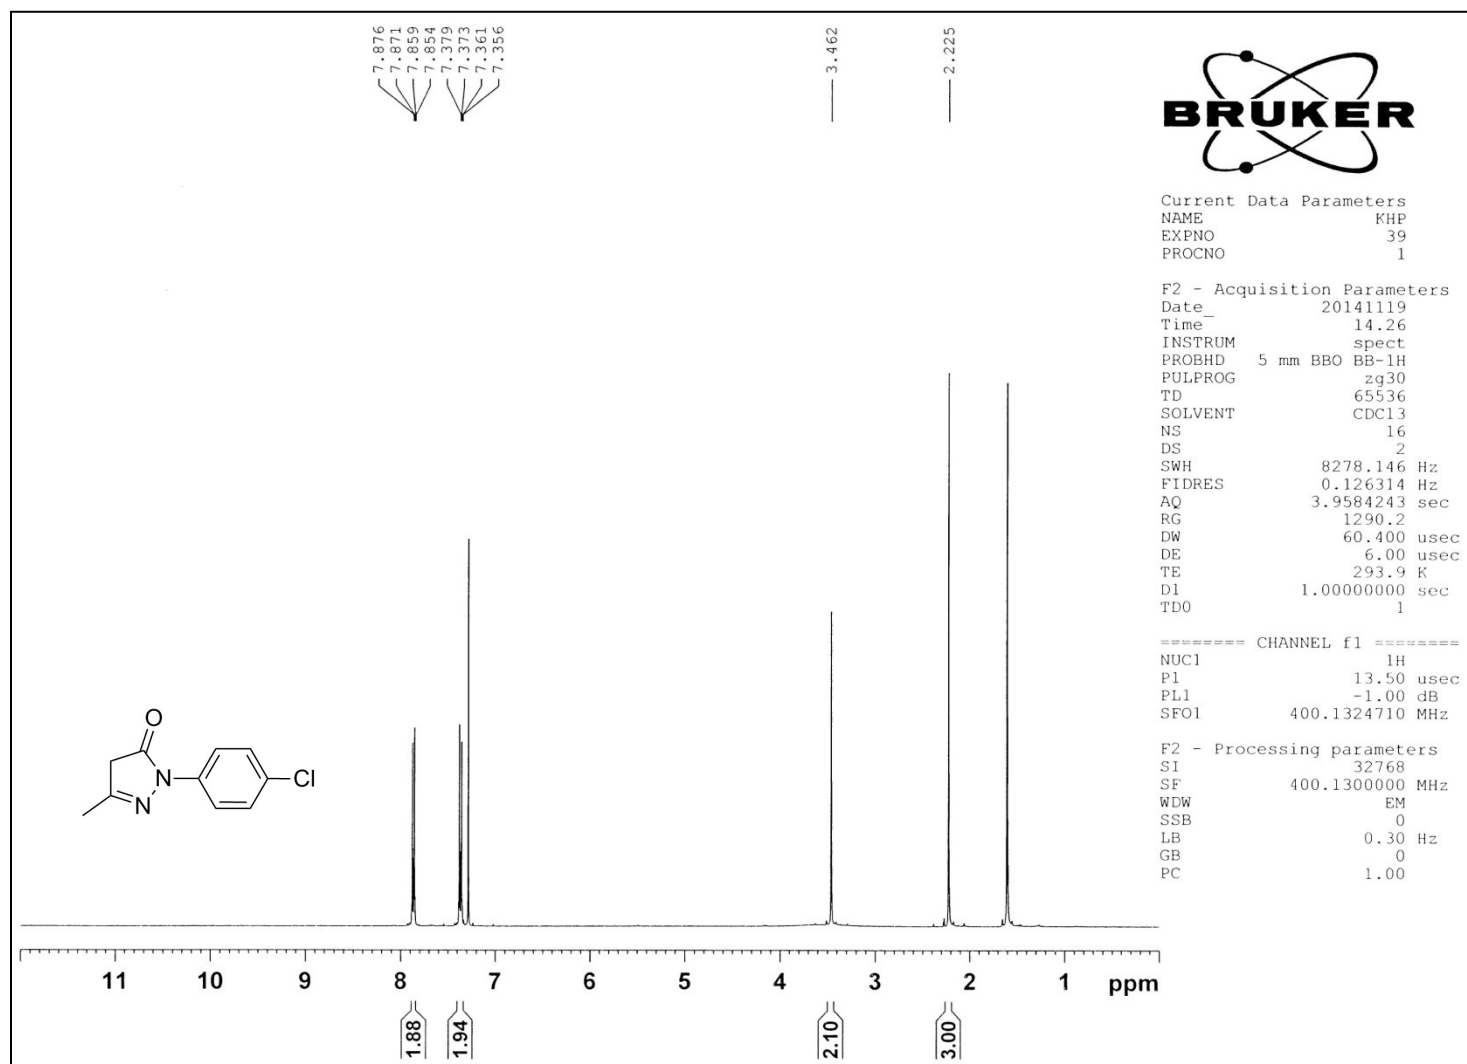

<sup>13</sup>C NMR spectra of compound **2a'**

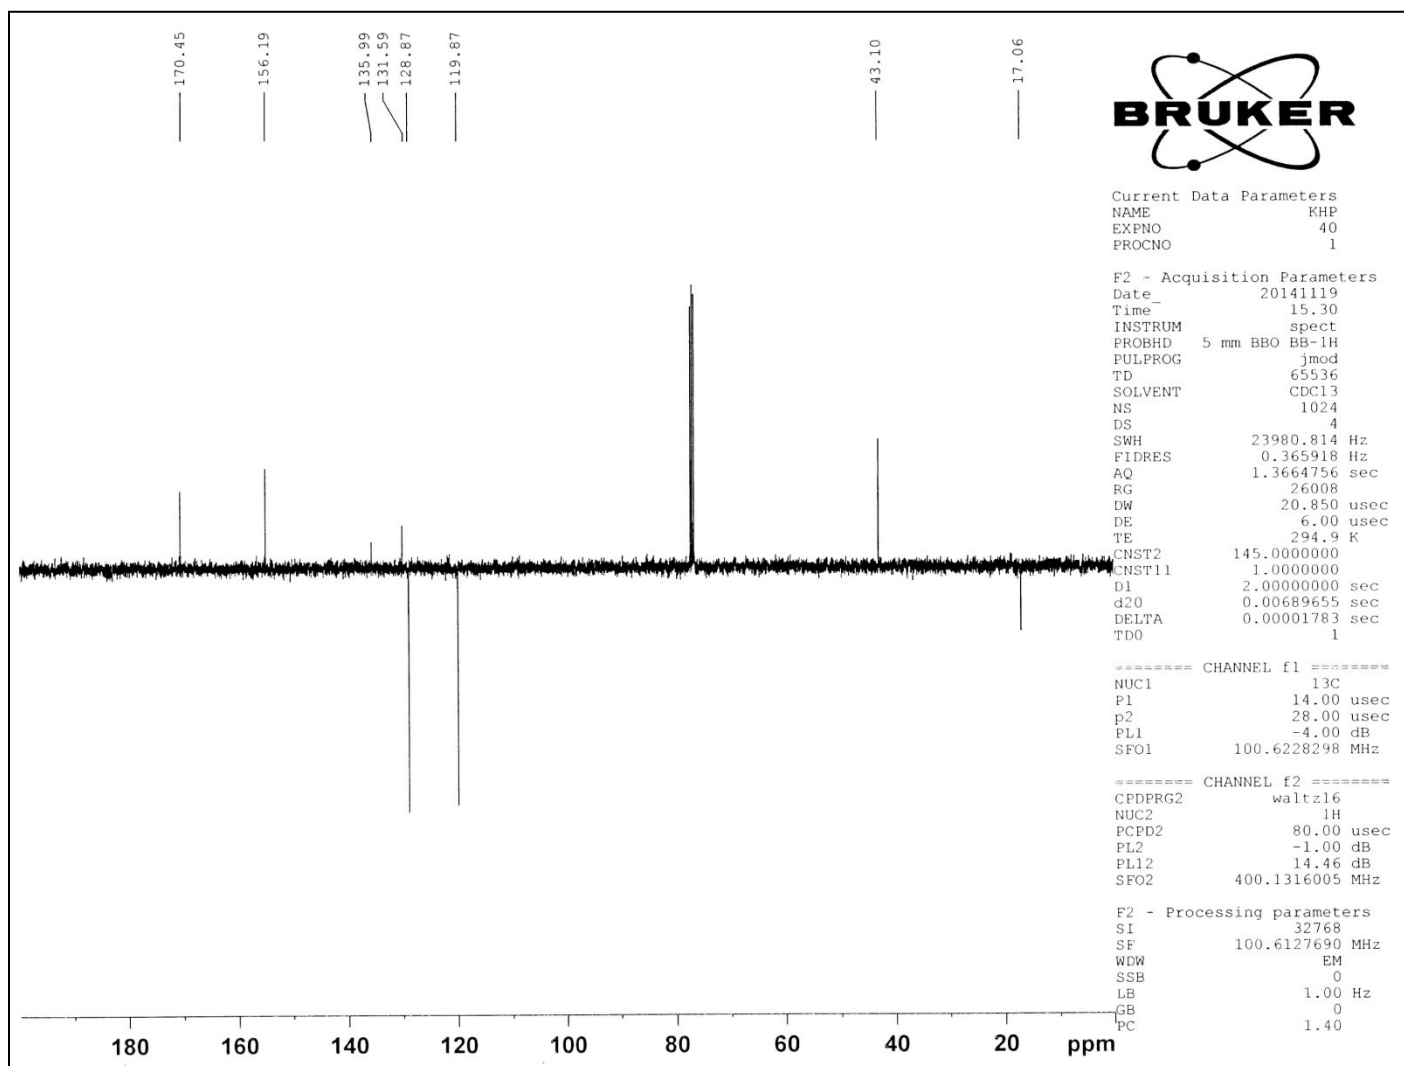

<sup>1</sup>H NMR spectra of compound **3a'**

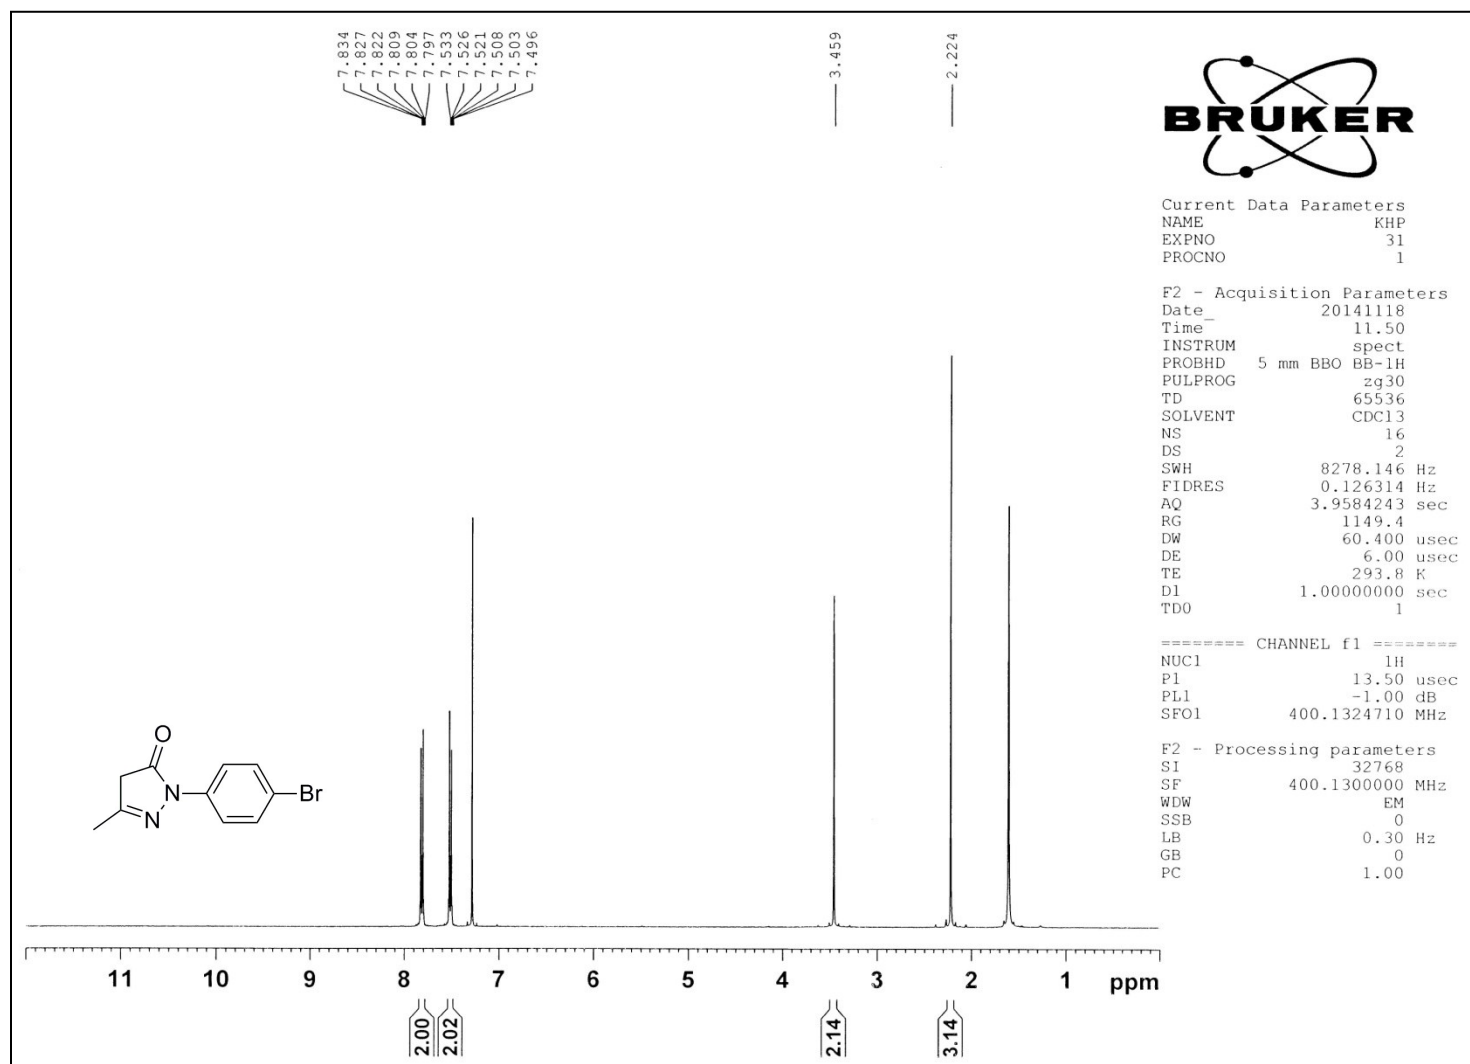

<sup>13</sup>C NMR spectra of compound 3a'

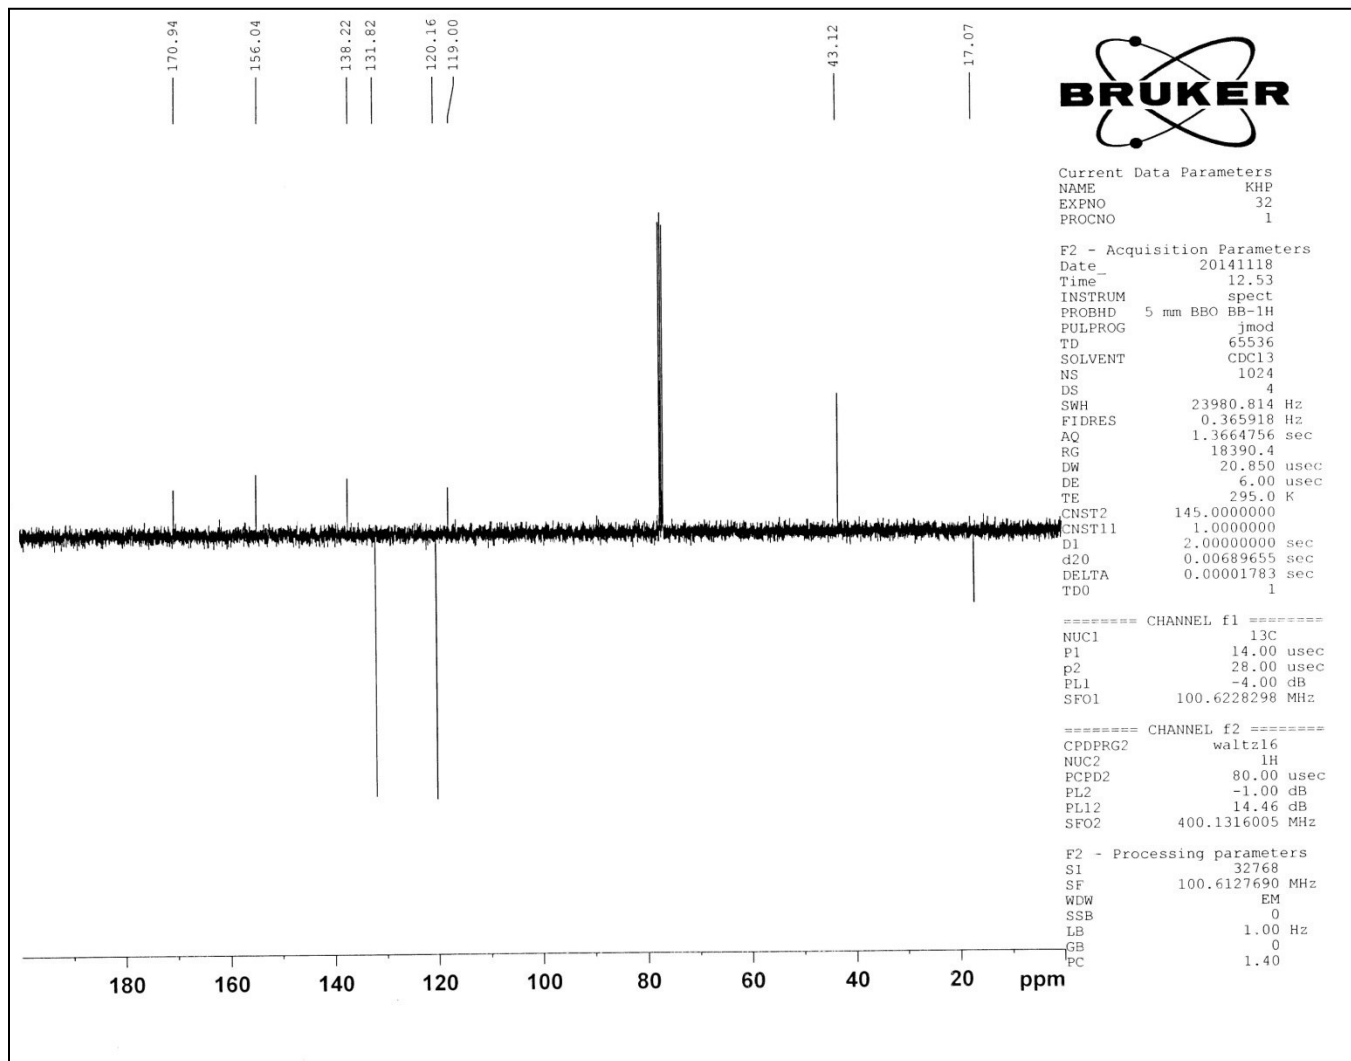

Supplement: c5cy00137d1.pdf [file c5cy00137d1.pdf]
